# Supplementary material for: The Combination of Catechin and Epicatechin Gallate from Fructus Crataegi Potentiates β-Lactam Antibiotics Against Methicillin-Resistant Staphylococcus aureus (MRSA) in Vitro and in Vivo
Source: Int J Mol Sci. 2013 Jan 16;14(1):1802–21. doi: 10.3390/ijms14011802 (PMC3565349; doi:10.3390/ijms14011802)

## Supplementary Materials

**Table S1.** Synergy of oxacillin in combination with C and EGC against WHO-2. Testing of synergy between different concentrations of C/EGC and oxacillin (OXA) was performed using the checkerboard method. FICI values were calculated as described in Experimental Section. <sup>a</sup> For C, the MIC of C against WHO-2 was >1024 mg/L; <sup>b</sup> For EGC, the MIC against WHO-2 was 256 mg/L.

| C <sup>a</sup> | EGC <sup>b</sup> | OXA<br>MIC (mg/L) | FICI             |
|----------------|------------------|-------------------|------------------|
| 0              | 0                | 512               | cannot calculate |
|                | 16               | 512               | 1.063            |
|                | 32               | 512               | 1.125            |
|                | 64               | 512               | 1.250            |
| 16             | 0                | 512               | <1.016           |
|                | 16               | 512               | <1.078           |
|                | 32               | 512               | <1.141           |
|                | 64               | 512               | <1.266           |
| 32             | 0                | 512               | <1.031           |
|                | 16               | 512               | <1.095           |
|                | 32               | 512               | <1.157           |
|                | 64               | 512               | <1.282           |
| 64             | 0                | 512               | <1.063           |
|                | 16               | 256               | <0.626           |
|                | 32               | 256               | <0.688           |
|                | 64               | 256               | <0.578           |
| 128            | 0                | 512               | <1.125           |
|                | 16               | 512               | <1.188           |
|                | 32               | 512               | <1.250           |
|                | 64               | 256               | <0.750           |
| 256            | 0                | 512               | <1.250           |
|                | 16               | 512               | <1.313           |
|                | 32               | 512               | <1.375           |
|                | 64               | 256               | <1.000           |
| 512            | 0                | 256               | <1.000           |
|                | 16               | 128               | <0.813           |
|                | 32               | 32                | <0.688           |
|                | 64               | <4                | <0.750           |

**Table S2.** Synergy of oxacillin in combination with EGC and ECg against WHO-2. Testing of synergy between EGC, ECg and oxacillin (OXA) at different concentrations in the inhibition of WHO-2 was performed using the checkerboard method. FICI values were calculated as described in Experimental Section. <sup>a</sup> For EGC, the MIC against WHO-2 was 256 mg/L; <sup>b</sup> For ECg, the MIC against WHO-2 was 128 mg/L.

| EGC <sup>a</sup> | ECg <sup>b</sup> | MIC of OXA (mg/L) | FICI             |
|------------------|------------------|-------------------|------------------|
| 0                | 0                | 512               | cannot calculate |
|                  | 8                | 512               | 1.625            |
|                  | 16               | 256               | 0.625            |
|                  | 32               | 128               | 0.500            |
| 16               | 0                | 512               | 1.063            |
|                  | 8                | 512               | 1.125            |
|                  | 16               | 512               | 1.187            |
|                  | 32               | 256               | 0.813            |
| 32               | 0                | 512               | 1.125            |
|                  | 8                | 256               | 0.688            |
|                  | 16               | 256               | 0.750            |
|                  | 32               | 128               | 0.563            |
| 64               | 0                | 512               | 1.250            |
|                  | 8                | 256               | 0.563            |
|                  | 16               | 64                | 0.500            |
|                  | 32               | 64                | 0.625            |
| 128              | 0                | 512               | 1.5              |
|                  | 8                | 32                | 0.625            |
|                  | 16               | <4                | <0.625           |
|                  | 32               | <4                | <0.750           |

**Table S3.** FICI values of C and ECg in combination with non- $\beta$ -lactam antibiotics against MRSA WHO-2. Synergistic activities of different concentrations of C, ECg and anti-MRSA antibiotics including vancomycin, linezolid and teicoplanin were tested against 22 clinical MRSA strains by checkerboard method. FICI values were calculated as described in Experimental Section. <sup>a</sup> The MIC range, MIC<sub>50</sub>, MIC<sub>90</sub> against 45 clinical MRSA strains were 512–4096 mg/L, 2048 mg/L and 4096 mg/L for C, respectively; <sup>b</sup> and 32–1024 mg/L, 64 mg/L and 1024 mg/L for ECg, respectively; <sup>c</sup> Data were expressed as means  $\pm$  standard deviations. Values in parentheses indicated the number of strains for which drug combinations resulted in synergism/number of strains tested.

| Antibiotics | MIC of non-β-lactam antibiotics (mg/L)                                     |                   |                   |         |                   |                   |                       |         |                   |                   |                       |          |                   |                   |                       |
|-------------|----------------------------------------------------------------------------|-------------------|-------------------|---------|-------------------|-------------------|-----------------------|---------|-------------------|-------------------|-----------------------|----------|-------------------|-------------------|-----------------------|
|             | concentration of C <sup>a</sup> + concentration of ECg <sup>b</sup> (mg/L) |                   |                   |         |                   |                   |                       |         |                   |                   |                       |          |                   |                   |                       |
|             | 0                                                                          |                   |                   | 32 + 4  |                   |                   |                       | 64 + 8  |                   |                   |                       | 128 + 16 |                   |                   |                       |
|             | Range                                                                      | MIC <sub>50</sub> | MIC <sub>90</sub> | Range   | MIC <sub>50</sub> | MIC <sub>90</sub> | FICI <sup>c</sup>     | Range   | MIC <sub>50</sub> | MIC <sub>90</sub> | FICI <sup>c</sup>     | Range    | MIC <sub>50</sub> | MIC <sub>90</sub> | FICI <sup>c</sup>     |
| vancomycin  | 2–64                                                                       | 4                 | 8                 | 2–64    | 4                 | 8                 | 1.30 ± 0.61<br>(2/22) | 2–64    | 4                 | 8                 | 1.34 ± 0.69<br>(2/22) | 0.25–64  | 0.25              | 8                 | 0.83 ± 0.60<br>(8/22) |
| linezolid   | 0.5–64                                                                     | 2                 | 4                 | 0.25–64 | 8                 | 8                 | 1.04 ± 0.53<br>(2/22) | 0.25–64 | 1                 | 8                 | 1.15 ± 0.58<br>(2/22) | 0.25–64  | 0.5               | 4                 | 0.95 ± 0.57<br>(8/22) |
| teicoplanin | 1–64                                                                       | 4                 | 16                | 0.25–64 | 2                 | 8                 | 1.16 ± 0.66<br>(4/ 2) | 0.25–8  | 8                 | 8                 | 1.15 ± 0.89<br>(4/22) | 0.25–64  | 8                 | 8                 | 0.88 ± 0.58<br>(3/22) |

**Table S4.** The primers for *mecA*, *norA*, *norB*, *norC*, *mepA*, *mdeA*, *sepA*, *qacA/B*, *abcA*, *smr* and 16S RNA.

| Gene          |    | Primer                          | Length of product |
|---------------|----|---------------------------------|-------------------|
| <i>mecA</i>   | PF | 5'-GATTATGGCTCAGGTACTGCTATCC-3' | 70 bp             |
|               | PR | 5'-ATGAAGGTGTGCTTACAAGTGCTAA-3' |                   |
| <i>norA</i>   | PF | 5'-CGGTCTAGTGATAACCAGTCT-3'     | 268 bp            |
|               | PR | 5'-AACCATAACCAGCACTCATAC-3'     |                   |
| <i>norB</i>   | PF | 5'-AGCGCGTTGTCTATCTTTCC-3'      | 213 bp            |
|               | PR | 5'-GCAGGTGGTCTTGCTGATAA-3'      |                   |
| <i>norC</i>   | PF | 5'-AATGGGTCTTAAGCGACCAA-3'      | 216 bp            |
|               | PR | 5'-ATACCTGAAGCAACGCCAAC-3'      |                   |
| <i>mepA</i>   | PF | 5'-TGCTGCTGCTCTGTTCTTTA-3'      | 198 bp            |
|               | PR | 5'-GCGAAGTTTCCATAATGTGC-3'      |                   |
| <i>mdeA</i>   | PF | 5'-GTTTATGCGATTCTGAATGGTTGGT-3' | 155 bp            |
|               | PR | 5'-AATTAATGCAGCTGTTCCGATAGA-3'  |                   |
| <i>sepA</i>   | PF | 5'-GCAGTCGAGCATTTAATGGA-3'      | 103 bp            |
|               | PR | 5'-ACGTTGTTGCAACTGTGTAAGA-3'    |                   |
| <i>smr</i>    | PF | 5'-ATTGGAAGTGCATTTCTTAA-3'      | 257 bp            |
|               | PR | 5'-AACGAACTACGCCGACTAT-3'       |                   |
| <i>qacA/B</i> | PF | 5'-TGGCTTCACTAGCAGTTGCA-3'      | 238 bp            |
|               | PR | 5'-ACAGCGCCCACTACAGATTC-3'      |                   |
| <i>abcA</i>   | PF | 5'-GTCGGTGCAAGTAGTAGAAT-3'      | 216 bp            |
|               | PR | 5'-TTTACCAGACCCAGAAGG-3'        |                   |
| 16S           | PF | 5'-GAGAGAAGGTGGGGATGACGT-3'     | 217 bp            |
|               | PR | 5'-AGGCCCGGGAACGTATTCAC-3'      |                   |

**Figure S1.** The influence of daunorubicin on the growth of MRSA WHO-2. Each single colony from the MH agar plate was inoculated into a 10 mL volume of MH broth (containing 2% NaCl) according to the CLSI 2010 guidelines and cultivated aerobically at 37 °C in a heated and shaking chamber for 12 h to reach OD600 = 0.6. These cultures were treated with different concentrations of daunorubicin of 0 mg/L, 20 mg/L and 40 mg/L and cultivated in the dark at 37 °C, 100 g for 0.5, 1.5 and 2 h. 100 µL of bacteria was collected and measured at OD600. Result was shown with time-kill curve.

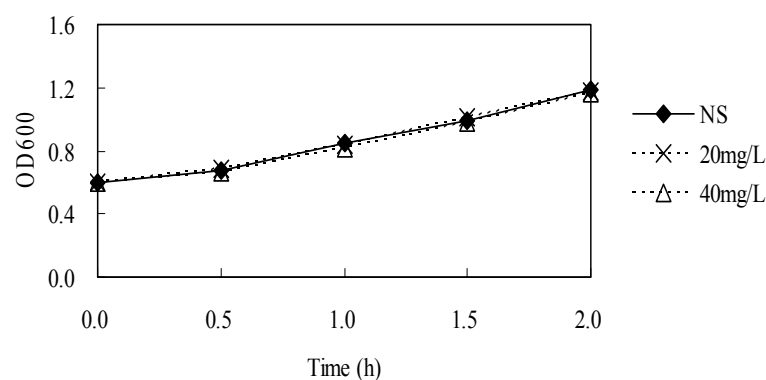

Supplement: Supplementary file 1 [file ijms-14-01802-s001.pdf]
